# Supplementary material
Source: publisher site journal article supplement (https://static.cambridge.org/content/id/urn:cambridge.org:id:article:S0899823X20001531/resource/name/S0899823X20001531supp001.doc)
Supplement: Supplementary file 1 [file S0899823X20001531supp001.doc]

**SUPPLEMENTARY TABLES**

**Supplementary table 1: Codes used to detect hematologic malignancies**

|  | Included | Excluded |
| --- | --- | --- |
| **Codes used to detect hematologic malignancies, in ICD-9-CM coding** |  |  |
| AML | 205[023][023456789]  206[02][023456789]  207[02][023456789] | 20x.x1 codes were excluded because they notify in-remission patients |
| ALL | 204[023][023456789] | 204.x1 codes were excluded because they notify in-remission patients |
| NHL | 200.xx  202.xx  196.xx |  |
| HL | 201.xx |  |
| **Codes used to detect hematologic malignancies, in ICD-10-CM coding** |  |  |
| AML | C92[0356A][023456789]  C93[09][023456789]  C94[02][023456789] |  |
| ALL | C91[0356A] [023456789] |  |
| NHL | C82, C83, C84, C85, C86, C88 |  |
| HL | C81 |  |

AML: acute myeloid leukemia; ALL: acute lymphoblastic leukemia; NHL: non-Hodgkin lymphoma; HL: Hodgkin’s lymphoma; HSCT: Hematopoietic Stem Cell Transplant

**Supplementary table 2: Codes used to detect HSCT**

| **Diagnosis codes used to detect HSCT, in ICD-9-CM coding** |  |
| --- | --- |
| Auto | 41.0[01479] |
| Allo | 41.0[23568] |
| **Diagnosis codes used to detect HSCT, in ICD-10-CM coding** |  |
| Auto | 3023[03][GYX]0  3024[03][GYX]0  3026[03][XGY]0 |
| Allo | 3023[03][GYX][1234]  3024[03][GYX][1234]  3026[03][XGY]1 |
| **DRG codes used to detect HSCT (MS-DRG v34)** |  |
| Auto | 16  17 |
| Allo | 14 |

HSCT: Hematopoietic Stem Cell Transplant; DRG: Diagnosis Related Group

**Supplementary Table 3: Comparison of matched, unmatched, and all CDI+ patients**

|  | **Mean value** | **Comparison with all CDI+ patients** | **Comparison with matched CDI+ patients** | **Comparison with unmatched CDI+ patients** |
| --- | --- | --- | --- | --- |
| **Total costs of the hospital stay (US$)** | | | | |
| **All CDI+ patients** | **212,936** |  | p=0.08 | p=2.10-5 |
| **Matched CDI+ patients** | **193,524** | p=0.08 |  | p=2.10-6 |
| **Unmatched CDI+ patients** | **370,972** | p=2.10-5 | p=2.10-6 |  |

CDI+: Patients with *Clostridioides difficile* infection after cancer diagnosis; CDI-: patients without *Clostridioides difficile* infection reported

**Supplementary Table 4: Healthcare costs per patient (2017 US$), by antibiotic class**

| **Healthcare costs, (over study period, 2017 US$)** | | **CDI+ (Cases)** | **CDI- (Controls)** | **Diff.** | **p-value (Welch’s**  **t-test)** |
| --- | --- | --- | --- | --- | --- |
| **Cephalosporins** | **Mean** *(IQR)* Median | 79.5 61.0 18.7 | 24.2 26.8 9.8 | 55.3 | p=0.039 |
| **Macrolides** | **Mean** *(IQR)* Median | 89.5 18.8 17.6 | 23.4 14.1 7.3 | 66.1 | p=0.278 |
| **Penicillins** | **Mean** *(IQR)* Median | 13.7 10.4 8.0 | 214.3 12.7 9.5 | -200.6 | p=3.10-5 |
| **Quinolones** | **Mean** *(IQR)* Median | 31.1 22.6 12.7 | 53.0 20.4 13.5 | -21.9 | p=6.10-4 |
| **Sulfonamides** | **Mean** *(IQR)* Median | 20.6 20.6 7.5 | 27.3 31.3 10.7 | -6.7 | p=0.035 |
| **Tetracyclines** | **Mean** *(IQR)*  Median | 27.9 24.9  9.7 | 108.1 50.6  25.0 | -80.2 | p=0.004 |
| **Other** | **Mean** *(IQR)* Median | 478.0 338.4 122.7 | 1,204.6 3,171.8 443.6 | -726.6 | p=7.10-4 |

CDI+: Patients with *Clostridioides difficile* infection after cancer diagnosis; CDI-: patients without *Clostridioides difficile* infection reported
